# Supplementary material
Source: PubMed Central journal article supplement (PMC3123121)
Supplement: supp_M111.249235_jbc.M111.249235-1.pdf [file supp_M111.249235_jbc.M111.249235-1.pdf]

## Supplemental Figure legends

### Supplemental Figure 1. Deletion mutants within the *I12b* enhancer modify IL-12p40

**reporter activity** (A) The sequence of the *I12b* enhancer between the EnPr2 and EnPr3 boundaries is shown. Deletion mutants were designed to contain the entire EnPr2 reporter construct except for each respective 10 bp sequence labeled a through i. The NFIL-3 binding site is partially lost in deletion mutants h and i. (B and C) Luciferase reporter activity in stably transfected RAW267.4 macrophages is shown following stimulation with LPS or LPS + IL-10 for the times indicated. Data are presented as mean relative luciferase units (RLU) plus the SD (B), or the fold change in RLU plus the SD compared to time = 0 (C).

### Supplemental Figure 2. Neither C/EBP $\beta$ nor C/EBP $\delta$ are required to regulate IL-12p40.

(A) BMDMs from *Cebpb*<sup>-/-</sup> or WT littermate controls were stimulated with LPS or LPS + IL-10 for 24 hr. IL-12p40 was detected in the supernatants by ELISA, and data are presented as the mean concentration plus the SD. (B) BMDMs from *Cebpd*<sup>-/-</sup> or WT littermate controls were stimulated with LPS or LPS + IL-10 over time, and IL-12p40 transcripts were analyzed by qRT-PCR. Data are presented as the mean IL-12p40 mRNA normalized to Gapdh  $\pm$  the SD.

### Supplemental Figure 3. NFIL-3, but not NFIL-3 mutants, binds the enhancer region of

*I12b*. (A-B) IVTT NFIL-3 was generated and bound to <sup>32</sup>P-labeled oligonucleotide probes and then complexes were resolved by electrophoresis. (A) Neither IVTT C/EBP $\beta$ , nor Arg1 (arginase 1, used as a negative control) bound to the *I12b* enhancer region as compared to NFIL-3. (B) Only IVTT generated NFIL-3, but not the DNA binding mutant NFIL-3 N83G, or the homodimer mutant NFIL-3 L108V, bound to the *I12b* enhancer region.

**Supplemental Table 1. Qualitative mass spectrometry summary.** Mass spectrometry was performed as described in the Materials and Methods. We filtered the data by first excluding high abundance nuclear proteins including splicing factors. The remaining proteins were then compared between the conditions used: LPS stimulation alone versus LPS + IL-10 stimulation for the same time period. Proteins unique to the LPS + IL-10 condition are listed first, followed by proteins found in both LPS or LPS + IL-10 stimulation. Last are proteins found only in the LPS stimulation. Note that these data do not represent quantitative determination of any protein but instead reflect relative enrichment in one condition versus another.



# Supplemental Figure 2

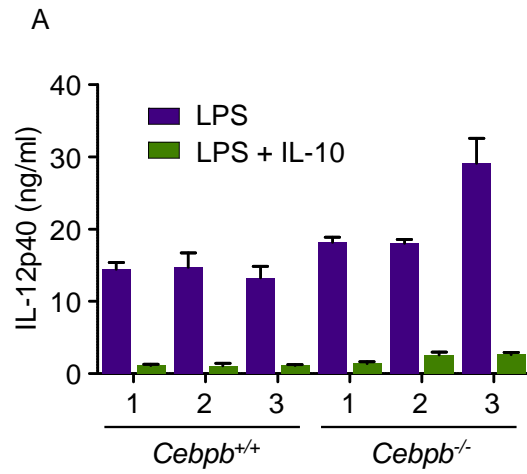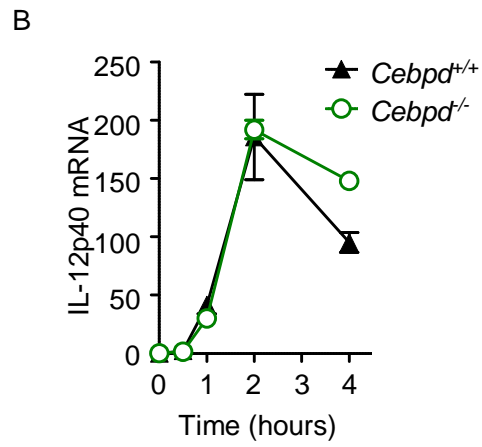

# Supplemental Figure 3

A

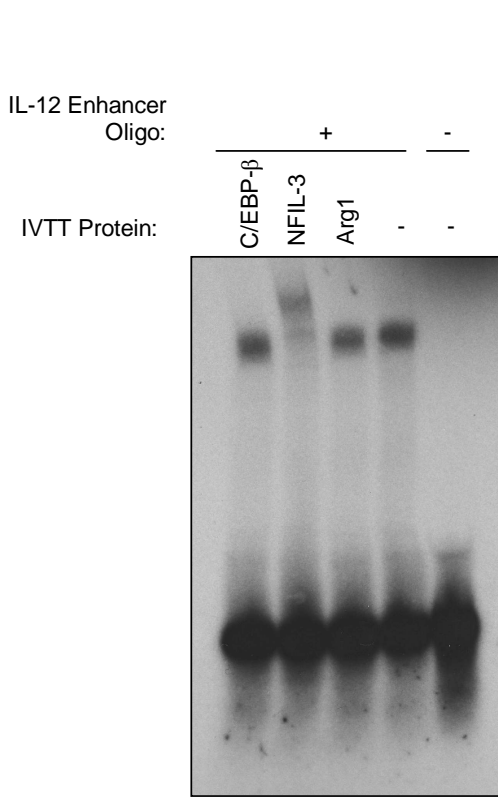

B

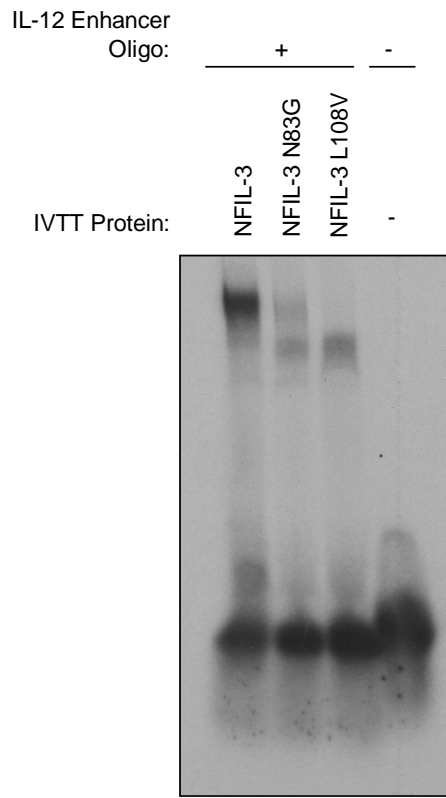

# Supplemental Table 1

| <i>LPS and IL-10 UNIQUE</i>        |                                                                                               | Regulated by IL-10 or the Stat3 pathway? | Notes                                                                 |
|------------------------------------|-----------------------------------------------------------------------------------------------|------------------------------------------|-----------------------------------------------------------------------|
| <b>CEBPD</b>                       | <b>CCAAT/enhancer-binding protein delta</b>                                                   | <b>IL-10 regulated</b>                   | <b>B-ZIP family</b>                                                   |
| EWS                                | RNA-binding protein EWS - Mus musculus                                                        |                                          | EWS founding member                                                   |
| ILF2                               | Interleukin enhancer-binding factor 2 - Mus musculus                                          |                                          | NFAT subunit                                                          |
| IRG1                               | Immune-responsive gene 1 protein                                                              |                                          | unknown function, often found in macrophage stress/cytokine responses |
| MED17                              | Mediator of RNA polymerase II transcription subunit 17                                        |                                          | Mediator subunit                                                      |
| <b>NFIL3</b>                       | <b>Nuclear factor interleukin-3-regulated protein</b>                                         | <b>IL-10 regulated</b>                   | <b>B-ZIP family</b>                                                   |
| NFKB1                              | Nuclear factor NF-kappa-B p105 subunit                                                        |                                          | p50 precursor                                                         |
| TAF6L                              | TAF6-like RNA polymerase II p300/CBP-associated factor                                        |                                          |                                                                       |
| <i>Common to LPS and LPS-IL-10</i> |                                                                                               |                                          |                                                                       |
| CA077                              | Uncharacterized protein C1orf77 homolog                                                       |                                          |                                                                       |
| CC127                              | Coiled-coil domain-containing protein 127                                                     |                                          |                                                                       |
| <b>CEBPB</b>                       | <b>CCAAT/enhancer-binding protein beta</b>                                                    | <b>IL-10 regulated</b>                   | <b>B-ZIP family</b>                                                   |
| DDX17                              | Probable ATP-dependent RNA helicase DDX17                                                     |                                          | helicase                                                              |
| DDX3X                              | ATP-dependent RNA helicase DDX3X                                                              |                                          | helicase                                                              |
| DDX5                               | Probable ATP-dependent RNA helicase DDX5                                                      |                                          | helicase                                                              |
| FOSL2                              | Fos-related antigen 2                                                                         |                                          | B-ZIP family                                                          |
| FUBP1                              | Far upstream element-binding protein 1                                                        |                                          |                                                                       |
| FUS                                | RNA-binding protein FUS                                                                       |                                          | EWS family member                                                     |
| IRF8                               | Interferon regulatory factor 8                                                                |                                          | IRF family                                                            |
| JUN                                | Transcription factor AP-1                                                                     |                                          | B-ZIP family                                                          |
| JUNB                               | Transcription factor jun-B                                                                    |                                          | B-ZIP family                                                          |
| MBB1A                              | Myb-binding protein 1A                                                                        |                                          |                                                                       |
| MPEG1                              | Macrophage-expressed gene 1 protein precursor                                                 |                                          |                                                                       |
| NONO                               | Non-POU domain-containing octamer-binding protein                                             |                                          |                                                                       |
| PURA                               | Transcriptional activator protein Pur-alpha                                                   |                                          |                                                                       |
| PURB                               | Transcriptional activator protein Pur-beta                                                    |                                          |                                                                       |
| SMU1                               | WD40 repeat-containing protein SMU1                                                           |                                          |                                                                       |
| SPI1                               | Transcription factor PU.1                                                                     |                                          | ETS family                                                            |
| TADBP                              | TAR DNA-binding protein 43                                                                    |                                          |                                                                       |
| TTC35                              | Tetratricopeptide repeat protein 35                                                           |                                          |                                                                       |
| YBOX1                              | Nuclease-sensitive element-binding protein 1                                                  |                                          |                                                                       |
| <i>LPS ALONE</i>                   |                                                                                               |                                          |                                                                       |
| ATF7                               | Cyclic AMP-dependent transcription factor ATF-7                                               |                                          |                                                                       |
| IFI4                               | Interferon-activable protein 204                                                              |                                          |                                                                       |
| MO4L1                              | Mortality factor 4-like protein 1                                                             |                                          |                                                                       |
| PLRG1                              | Pleiotropic regulator 1                                                                       |                                          |                                                                       |
| REQU                               | Zinc finger protein ubi-d4                                                                    |                                          |                                                                       |
| SNF5                               | SWI/SNF-related matrix-associated actin-dependent regulator of chromatin subfamily B member 1 |                                          |                                                                       |
| TNAP2                              | Tumor necrosis factor, alpha-induced protein 2                                                |                                          |                                                                       |
